# Supplementary material
Source: PubMed Central journal article supplement (PMC2587612)
Supplement: 0804872105_0804872105SI.pdf [file 0804872105_0804872105SI.pdf]

# Supporting Information

Tuteja et al. 10.1073/pnas.0804872105

[Movie S1 \(MOV\)](#)

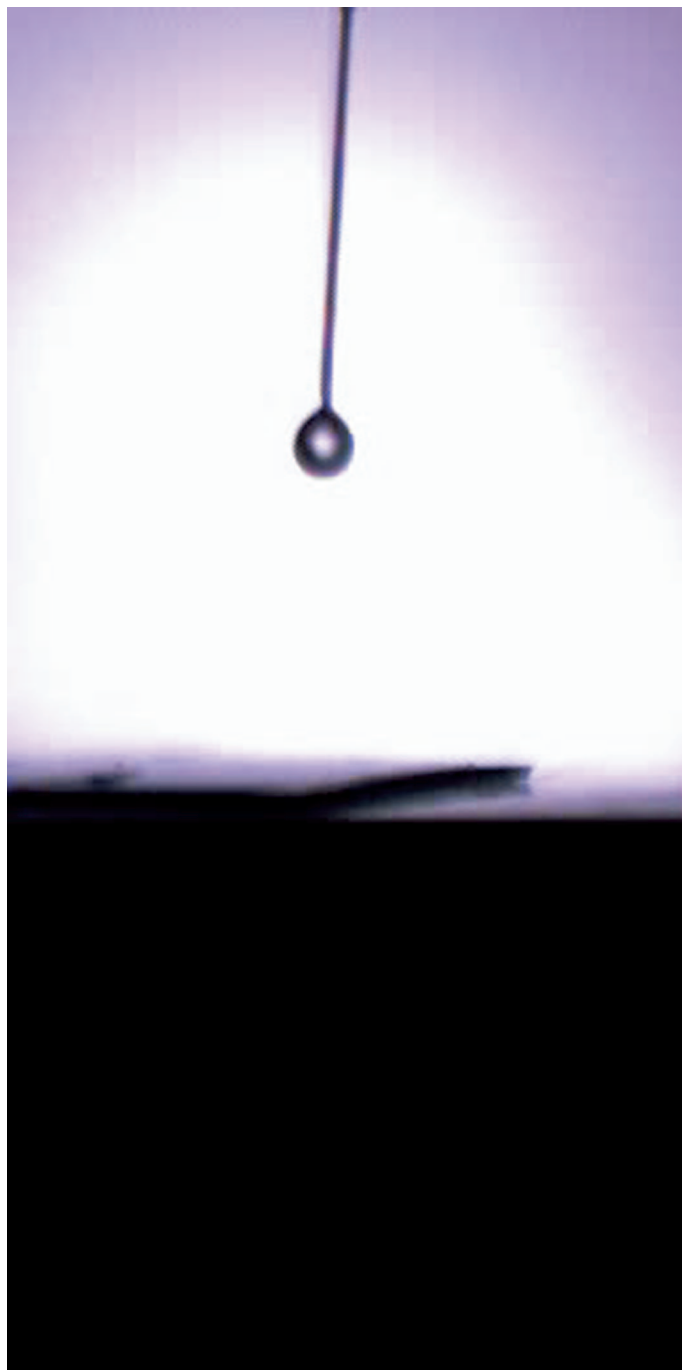

**Movie S1.** A movie illustrating the bouncing of a droplet of hexadecane ( $\gamma_{lv} = 27.5$  mN/m;  $\theta = 75^\circ$ ) on a silanized microhoodoo surface with  $\phi_s = 0.25$ ,  $D = 10$   $\mu\text{m}$ ,  $H = 7$   $\mu\text{m}$ ,  $R = 0.15$   $\mu\text{m}$ , and  $W = 10$   $\mu\text{m}$ . For the hexadecane droplet in the movie, the Weber number  $We = \rho V^2 R_{\text{drop}} / \gamma_{lv} \approx 10$ , where  $V$  is the droplet velocity before impact,  $\rho$  is the liquid density and  $R_{\text{drop}}$  ( $= 0.7$  mm) is the droplet radius. The Weber number compares the kinetic energy of the falling droplet with the interfacial energy of the drop. Because  $We \gg 1$ , the droplet deforms substantially on impact and subsequently loses most of its kinetic energy after impact by shape oscillations [Richard D, Quéré D (2000) *Europhys Lett* 6:769–775], leading to relatively low values for the coefficient of restitution.

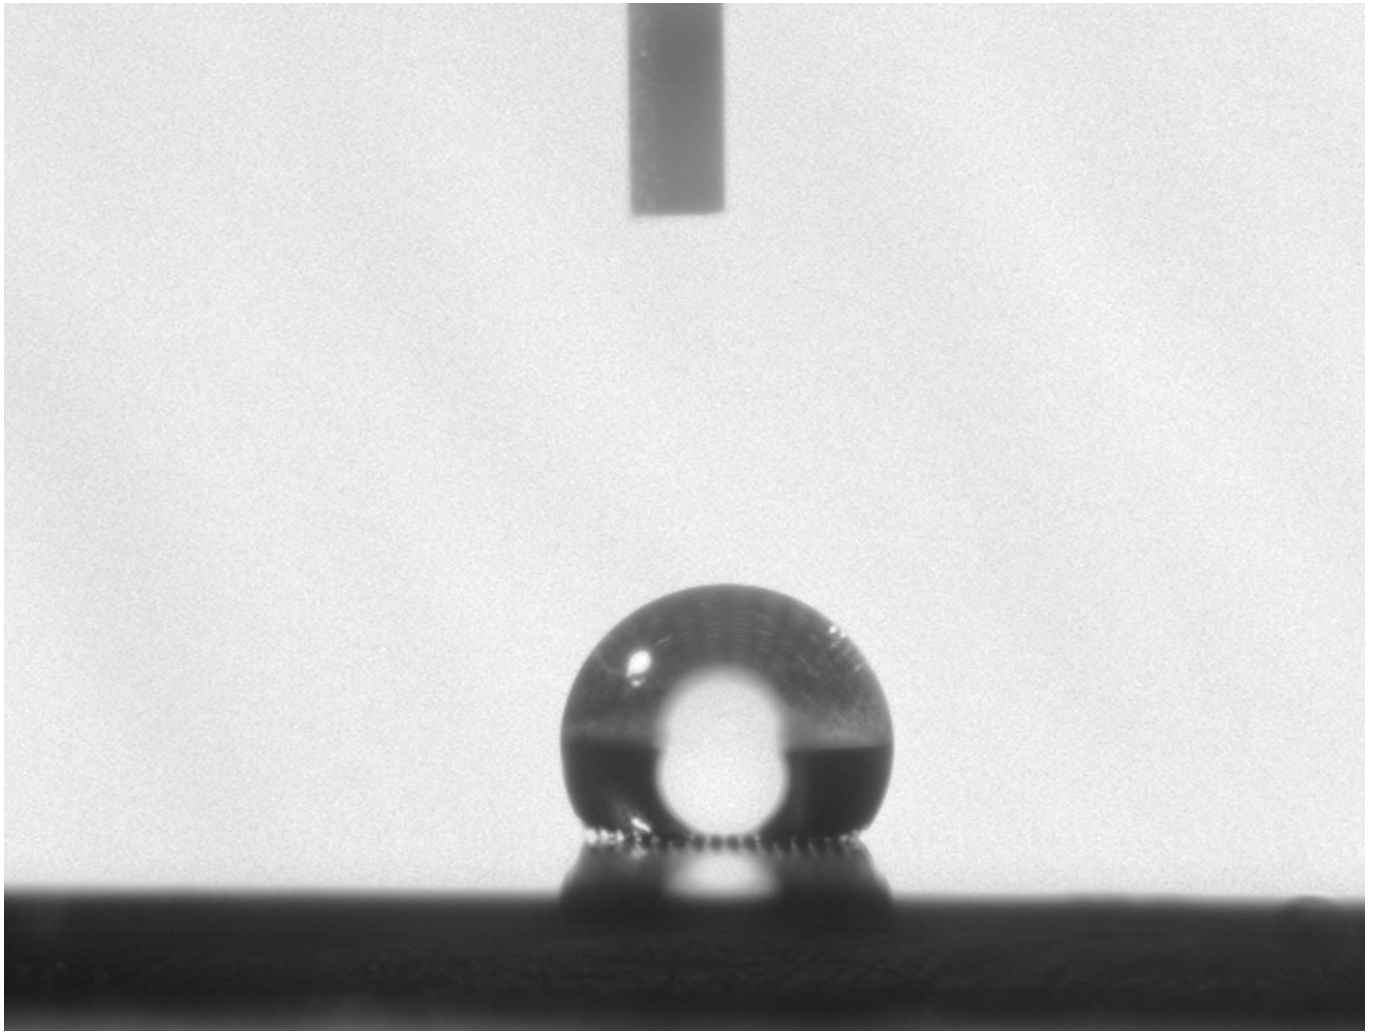

**Movie S2.** A movie (obtained over a period of 5 min) showing the evaporation of a droplet of methanol ( $\gamma_{lv} = 22.7$  mN/m;  $\theta = 60^\circ$ ) under ambient conditions, on a silanized microhoodoo surface with  $\phi_s = 0.11$ ,  $D = 20$   $\mu\text{m}$ ,  $H = 7$   $\mu\text{m}$ ,  $R = 0.15$   $\mu\text{m}$ , and  $W = 10$   $\mu\text{m}$ . We compute a value of  $A^* = 8.2$  for the system, which leads to a predicted breakthrough pressure of 219 Pa. The radius of the liquid droplet just before it transitions to the Wenzel state was recorded to be 450  $\mu\text{m}$ , which leads to a measured breakthrough pressure of 118.1 Pa.

[Movie S2 \(MOV\)](#)

## Other Supporting Information Files

[SI Appendix](#)
